# Supplementary material for: Nup98 recruits the Wdr82–Set1A/COMPASS complex to promoters to regulate H3K4 trimethylation in hematopoietic progenitor cells
Source: PubMed Central journal article supplement (PMC5769767; doi:10.1101/gad.306753.117), 2017-11-15

## Supplemental Material

### Oligonucleotides used to clone miRE knockdown vectors

#### MiRE-Luc-F (“Control shRNA”)

TGCTGTTGACAGTGAGCGCAGGAATTATAATGCTTATCTATAGTGAAGCCACAGATG  
TATAGATAAGCATTATAATTCCTATGCCTACTGCCTCGGA

#### MiRE-Luc-R

TCCGAGGCAGTAGGCATAGGAATTATAATGCTTATCTATACATCTGTGGCTTCACTA  
TAGATAAGCATTATAATTCCTGCGCTCACTGTCAACAGCA

#### MiRE-mWDR82-F

TGCTGTTGACAGTGAGCGCCAGTCGTTTACAGCTCTAACATAGTGAAGCCACAGAT  
GTATGTTAGAGCTGTAAACGACTGTTGCCTACTGCCTCGGA

#### MiRE-mWDR82-R

TCCGAGGCAGTAGGCAACAGTCGTTTACAGCTCTAACATACATCTGTGGCTTCACTA  
TGTTAGAGCTGTAAACGACTGGCGCTCACTGTCAACAGCA

#### MiRE-mNup98-F

TGCTGTTGACAGTGAGCGACACAACCAGTGCTCCTTCATATAGTGAAGCCACAGAT  
GTATATGAAGGAGCACTGGTTGTGCTGCCTACTGCCTCGGA

#### MiRE-mNup98-R

TCCGAGGCAGTAGGCAGCACAACCAGTGCTCCTTCATATACATCTGTGGCTTCACTA  
TATGAAGGAGCACTGGTTGTGCTGCCTACTGTCAACAGCA

## Supplemental Figure Legends

### Supplemental Figure 1. Nup98 binds to chromatin in the vicinity of H3K4me3

**regions in mouse HPCs.** (A) Nup98 and H3K4me3 ChIP-seq traces on chromosome 8 in mouse HPCs. A zoomed region indicated by the dotted box is enlarged at the bottom.

Nup98 and H3K4me3 called peaks are indicated by vertical black tick marks. (B) Graph showing the highest expressed gene clusters determined by analyzing the 1000 most expressed genes in mouse HPCs using DAVID. Gene clusters are ordered by p-value.

(C) DNA adenine methyltransferase identification (DAM-ID) fusion proteins used to

conduct DAM-ID to characterize binding of wt Nup98 and Nup98 $\Delta$ CTD in mouse HPCs.

(D) Genome browser region selected to show significant overlap between wt Nup98 and Nup98 $\Delta$ CTD in mouse HPCs. (E) Venn diagram showing overlap of wt Nup98 and Nup98 $\Delta$ CTD DAMID peaks. (F) Venn diagram showing overlap of wt Nup98 and Nup98 $\Delta$ CTD bound promoters.

**Supplemental Figure 2. Complete results from Co-IP/Mass-spec experiment in mouse RAW macrophage cells.** Mouse Raw macrophage cells stably expressing a control protein GFP or GFP-Nup98 $\Delta$ CTD were purified using Co-IP. Purified proteins were subjected to SDS-PAGE and bands were cut and analyzed by mass spec. The number of peptides for each protein identified in the GFP-Nup98 $\Delta$ CTD sample are shown on the right, while the number of peptides that purified with the control protein GFP are shown in the left column.

**Supplemental Figure 3. WDR82 knockdown causes slow growth and cell death in mouse HPCs.** (A) (Left side) Western blot showing protein levels for Nup98, Nup96, Set1A or a control protein GAPDH in the presence of a control shRNA targeting luciferase, shNup98 or shWDR82. (Right side) Western blot showing protein levels of WDR82, Set1A, MLL1 and Tubulin in WDR82 knockdown cells. Set1a is depleted in the presence of Wdr82 knockdown while MLL1 is not. (B) Qualitative observation of cell growth and viability in cells treated with shWDR82. Brightfield images are shown in panels 1-5 while GFP (indicating activation of shRNA expression in response to DOX) images are shown in panels 6-10. The percentage of cells alive is indicated in the bottom right corner of each GFP image. See Figure S4A to see control cells whose cell growth and viability were used to compare with shWDR82 knockdown cells. (C-D) Graphs

comparing % cells alive and total cell number over a time course for cells treated with a control shRNA targeting luciferase or an shRNA targeting WDR82.

**Supplemental Figure 4. Nup98 knockdown is lethal for mouse HPCs.**

(A) Qualitative observation of cell growth and viability in cells treated with shNup98. Brightfield images for control and Nup98 knockdown cells are shown in panels 1-5 and 11-15, respectively while GFP (indicating activation of shRNA expression in response to DOX) images for control and Nup98 knockdown cells are shown in panels 6-10 and 16-20, respectively. The percentage of cells alive is indicated in the bottom right corner of each GFP image. (B-C) Graphs comparing % cells alive and total cell number over a time course during which cells were treated with a control shRNA targeting luciferase or shNup98. (D) Genome wide histogram showing the relative binding of H3K4me3 in relation to promoter regions in control and Nup98 knockdown cells. (E) Graph comparing expression of the top 500 most misregulated genes in Nup98 knockdown cells (as determined by adjusted p-value) with expression of the same genes in Wdr82 knockdown cells. Each red dot represents a gene. Those red dots falling within the grey boxes in the upper right and lower left quadrant of the graph represent genes changing in the same direction (up or down, respectively) in response to either Nup98 or Wdr82 depletion.

**Supplemental Figure 5. Unusual H3K4me3 at HOXB locus overlapping with**

**Nup98-Nsd1 binding.** (A) ChIP-seq trace showing interaction of the indicated protein with the HOXB locus. Peaks called for each ChIP are shown at top of the figure. (B) Charts showing gene ontology analysis for the 1000 genes most misregulated in Nup98-Nsd1 expressing cells as compared to wild-type HOXA9 immortalized HPCs.

## **Supplemental Figure 6. Nup98-Nsd1 binds chromatin and triggers gene**

**misregulation in mouse HPCs.** (A) Schematic of the Flag-Nup98-Nsd1 protein as compared to wild-type Nup98 and a Nup98 mutant that can only localize in the nucleoplasm, Nup98- $\Delta$ CTD. Note that the portion of Nup98 that is fused with Nsd1 to make the Nup98-Nsd1 fusion protein is very similar to the Nup98- $\Delta$ CTD protein that was used to identify the interaction between Nup98 and the WDR82-Set1A-COMPASS complex (Figure 2). (B) Summary of genomic elements bound by Nup98-Nsd1 protein in mouse HPCs. (C) Gene ontology analysis of genes enriched for Nup98-Nsd1 binding in mouse HPCs. (D) Heat map showing dramatic mRNA misregulation between Nup98-Nsd1 expressing HPCs and wild-type HPCs. (E) Graph comparing gene expression in Nup98-Nsd1 cells relative to wild-type cells. Genes misexpressed  $> \log_2$  of 2-fold are highlighted in red. Meis1 and HOX genes discussed elsewhere in the manuscript are highlighted. The line of dots (genes) that appears in the graph is caused by the fact that we had many genes whose fpkm values were “0” for wild-type cells, but much higher for Nup98-Nsd1 expressing cells. Meis1 is an example of one of these genes.

Unfortunately, we cannot calculate  $\log_2$  ratios when “0” values are in the calculation and thus genes like Meis1 would be left out of the data set. To circumvent this, we gave these genes in wild-type cells an arbitrary fpkm of 1, which causes both the total FPKM and FPKM ratio (Nup98-Nsd1/Wild-type expression) values to equal each other. This allows us to visualize the expression of relevant genes like Meis1 that would otherwise be binned out of the analysis. (F) Venn diagram showing overlap of Nup98-Nsd1 peaks with genes misregulated in Nup98-Nsd1 expressing cells.

Lee, J.H., and Skalnik, D.G. (2008). Wdr82 is a C-terminal domain-binding protein that recruits the Setd1A Histone H3-Lys4 methyltransferase complex to transcription start sites of transcribed human genes. *Molecular and cellular biology* 28, 609-618.

Wu, M., Wang, P.F., Lee, J.S., Martin-Brown, S., Florens, L., Washburn, M., and Shilatifard, A. (2008). Molecular regulation of H3K4 trimethylation by Wdr82, a component of human Set1/COMPASS. *Molecular and cellular biology* 28, 7337-7344.

A

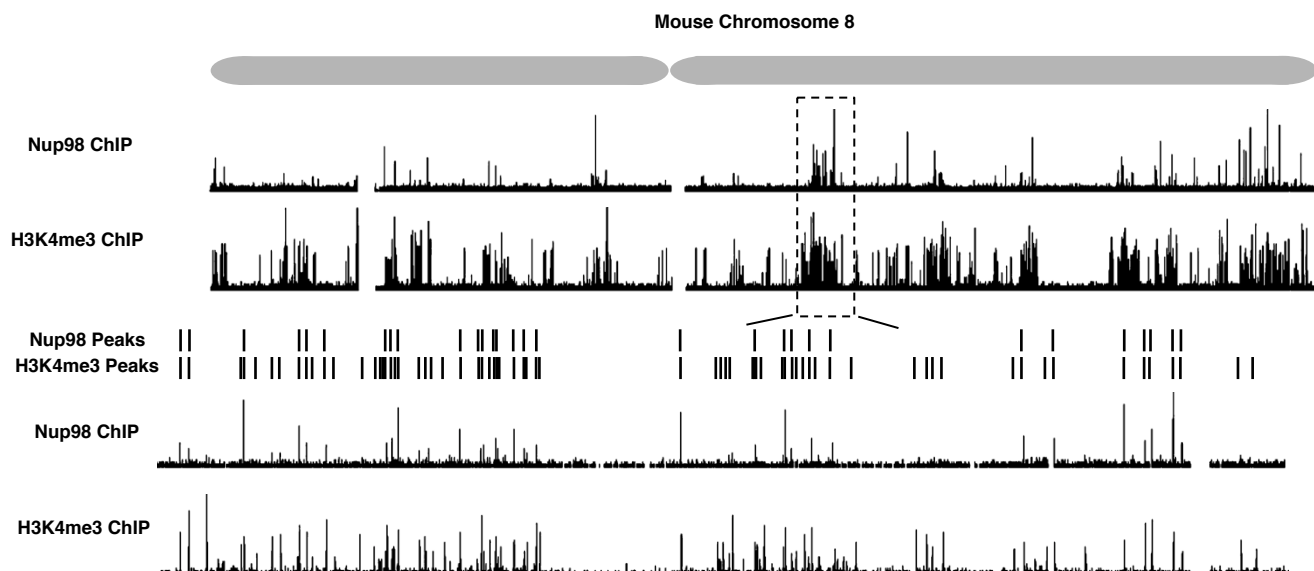

B

## HPCs – Highest Expressed Gene Clusters

| Functional Annotation                  | Genes | P-value  |
|----------------------------------------|-------|----------|
| Ribonucleoprotein/Ribosome/Translation | 101   | 1.80E-53 |
| Mitochondrion/Electron Transport       | 148   | 3.30E-38 |
| RNA binding/mRNA Processing            | 129   | 3.00E-33 |
| Cell-Cell Adhesion                     | 70    | 6.60E-29 |
| Protein Folding/Chaperone              | 48    | 3.10E-27 |
| Proteasome                             | 31    | 1.20E-26 |
| mRNA Splicing                          | 55    | 2.60E-24 |
| Protein Biosynthesis                   | 41    | 1.40E-21 |
| Endoplasmic Reticulum                  | 135   | 2.20E-16 |
| Citric Acid Cycle                      | 20    | 2.00E-13 |

C

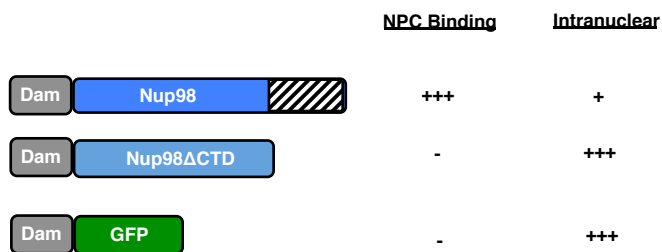

E

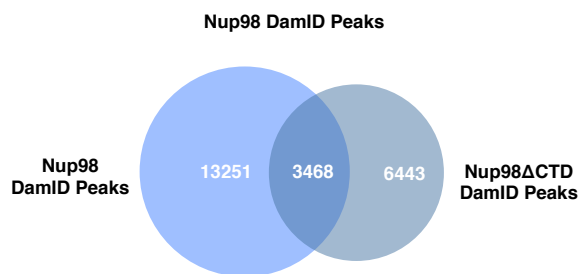

D

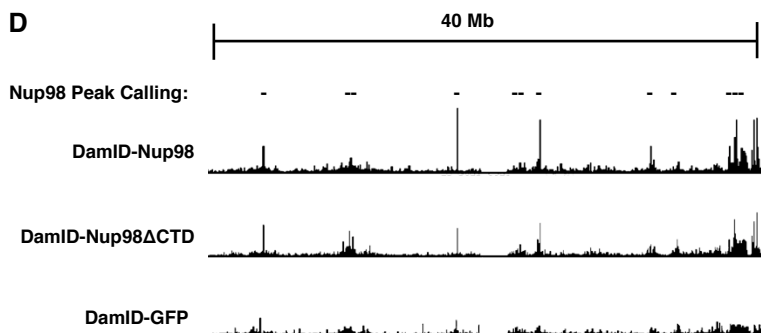

F

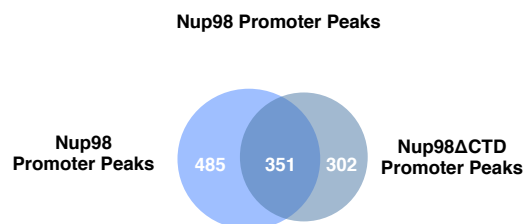

| Nup98 Intranuclear Binding Proteins - RAW cells |     |                   |
|-------------------------------------------------|-----|-------------------|
|                                                 | GFP | GFP-<br>Nup98ΔCTD |
| Rae1                                            | 0   | 324               |
| Ruvbl2                                          | 0   | 156               |
| Ruvbl1                                          | 0   | 133               |
| Nxf1                                            | 0   | 94                |
| WDR82                                           | 2   | 87                |
| Dtx3l                                           | 0   | 76                |
| Nup98                                           | 0   | 69                |
| C2orf44 homolog                                 | 0   | 62                |
| NMI                                             | 0   | 52                |
| PPP1ca                                          | 0   | 51                |
| Terf2ip                                         | 0   | 50                |
| Terf2                                           | 0   | 48                |
| Parp9                                           | 0   | 37                |
| Zc3h4                                           | 0   | 36                |
| Nupl2                                           | 0   | 25                |
| Prpf8                                           | 1   | 24                |
| Tox4                                            | 1   | 22                |
| Rpl7                                            | 2   | 20                |
| PPP1cb                                          | 1   | 18                |
| Rplp2                                           | 2   | 16                |
| Rpl4                                            | 0   | 14                |
| Zfml                                            | 0   | 14                |
| Elav1                                           | 1   | 12                |
| Rpl3                                            | 2   | 12                |
| Itgb4                                           | 0   | 12                |
| Gm6636                                          | 2   | 10                |
| Cpsf1                                           | 2   | 10                |
| Tfg                                             | 2   | 10                |
| Rps16                                           | 0   | 10                |
| Pcf11                                           | 2   | 10                |
| P4hb                                            | 0   | 8                 |
| Lgals3                                          | 0   | 8                 |
| Cltc                                            | 0   | 8                 |
| Eno1                                            | 0   | 8                 |
| Rpl13a                                          | 0   | 7                 |
| Rps9                                            | 0   | 7                 |
| Rpl9                                            | 1   | 7                 |
| Capg                                            | 0   | 7                 |
| Rps18                                           | 0   | 7                 |
| Rps4x                                           | 1   | 6                 |
| Anxa5                                           | 0   | 6                 |
| Rps3a                                           | 0   | 6                 |
| Gm11353                                         | 0   | 6                 |
| Fbl                                             | 0   | 6                 |
| Raly                                            | 0   | 6                 |
| Rpl23a                                          | 0   | 6                 |
| Rpl17                                           | 0   | 5                 |
| Cpsf2                                           | 0   | 5                 |
| ATP5b                                           | 0   | 5                 |
| 60S - L18like                                   | 0   | 5                 |
| GM6316                                          | 0   | 5                 |
| Chtf8                                           | 0   | 5                 |
| GM5611                                          | 0   | 5                 |
| DDX21                                           | 0   | 5                 |

**A**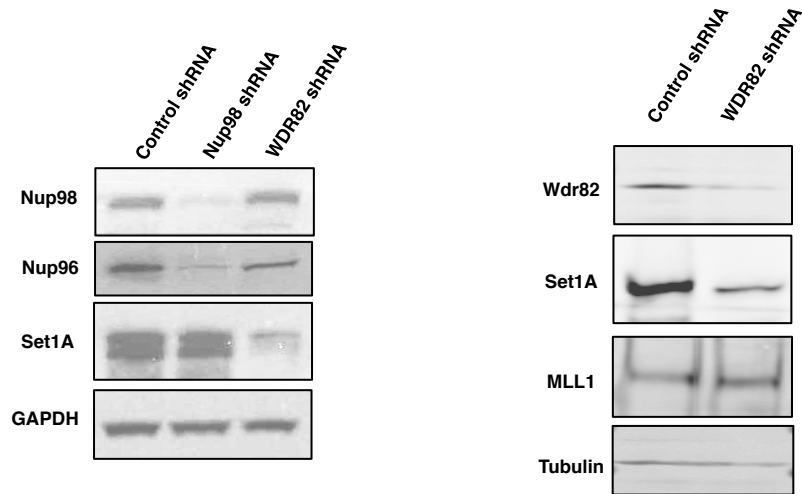**B**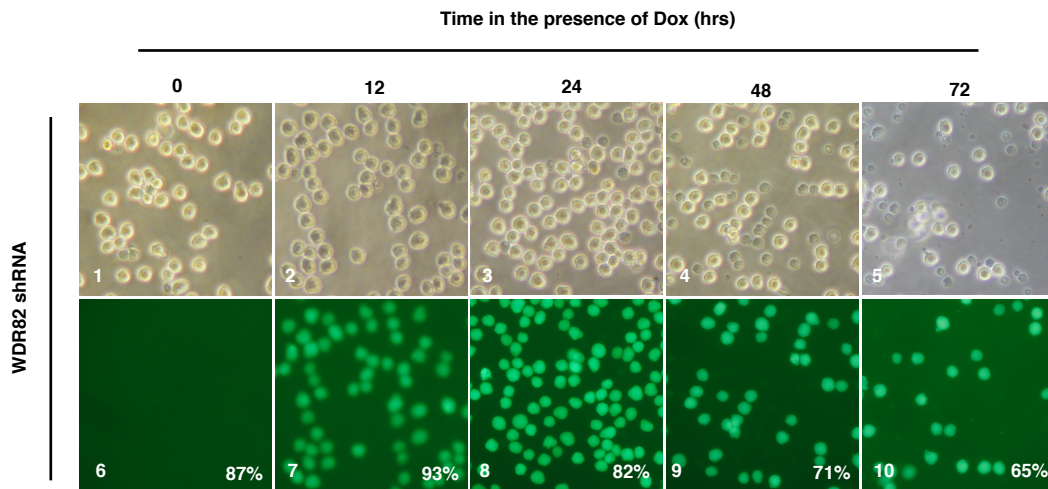**C**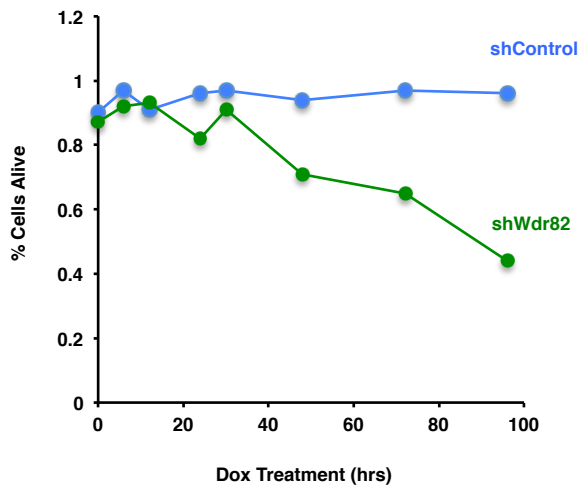**D**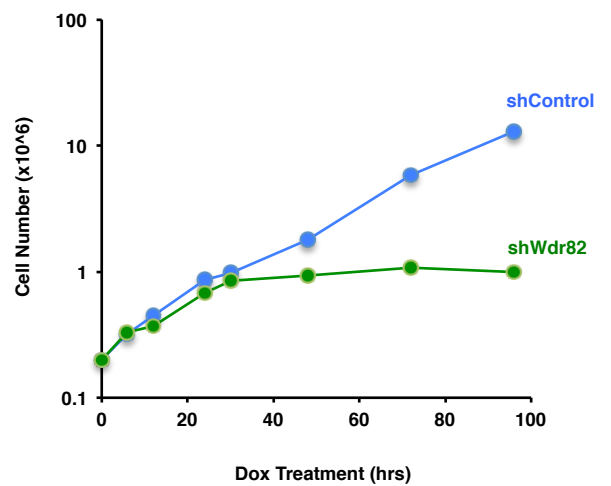



A

Time in the presence of Dox (hrs)

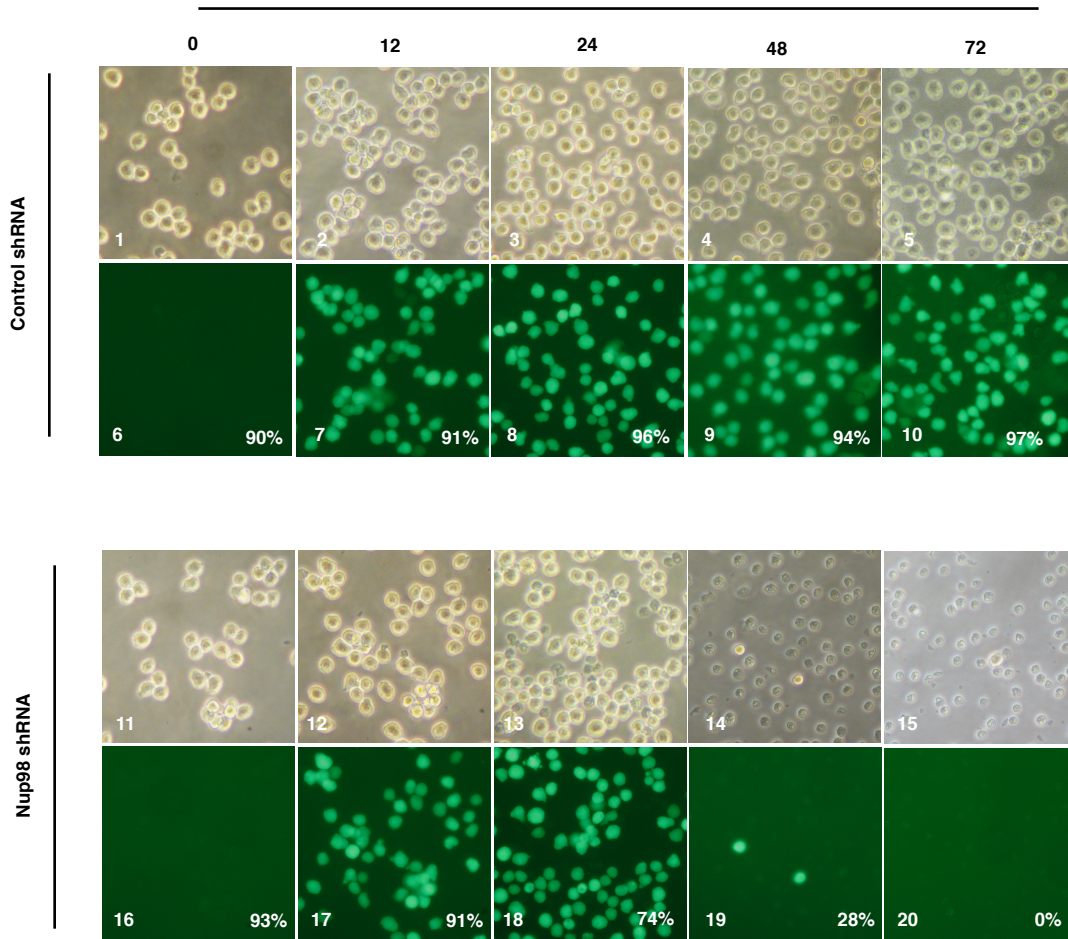

B

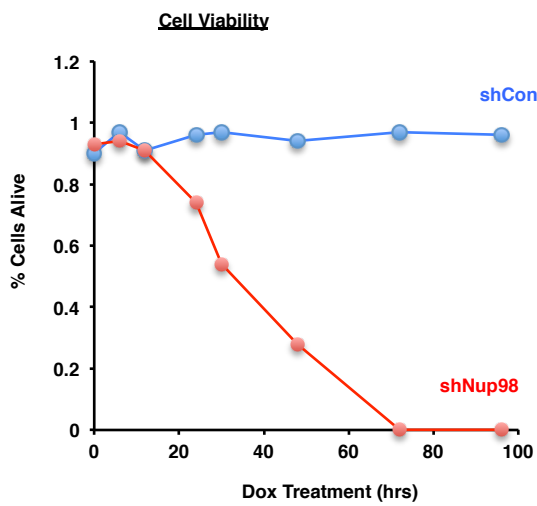

C

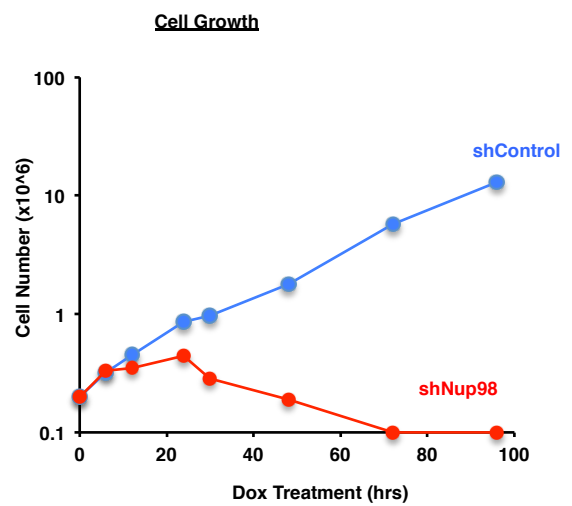

D

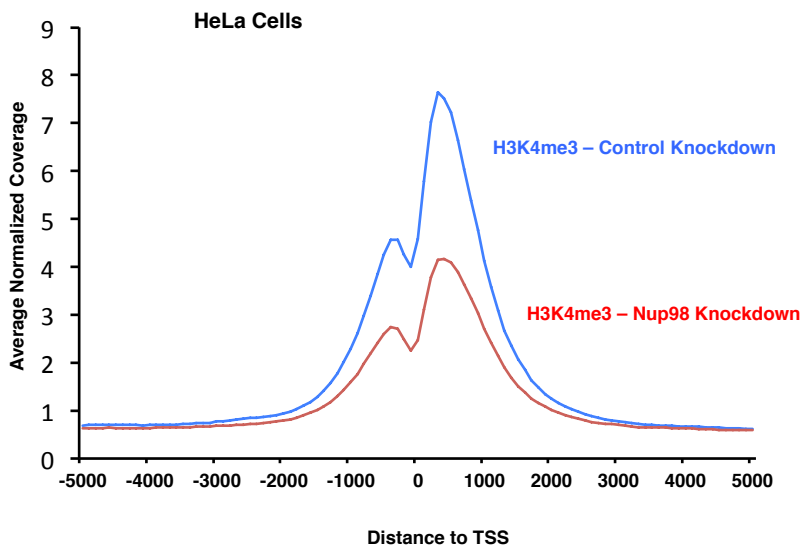

E

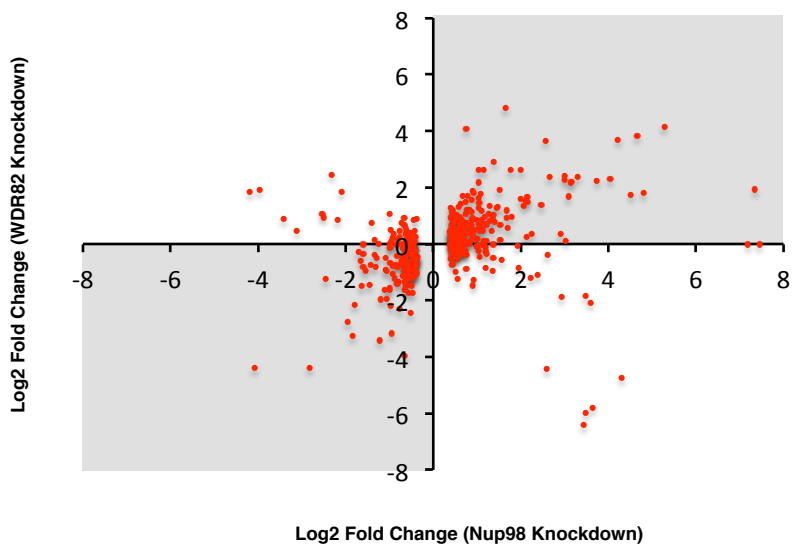

A

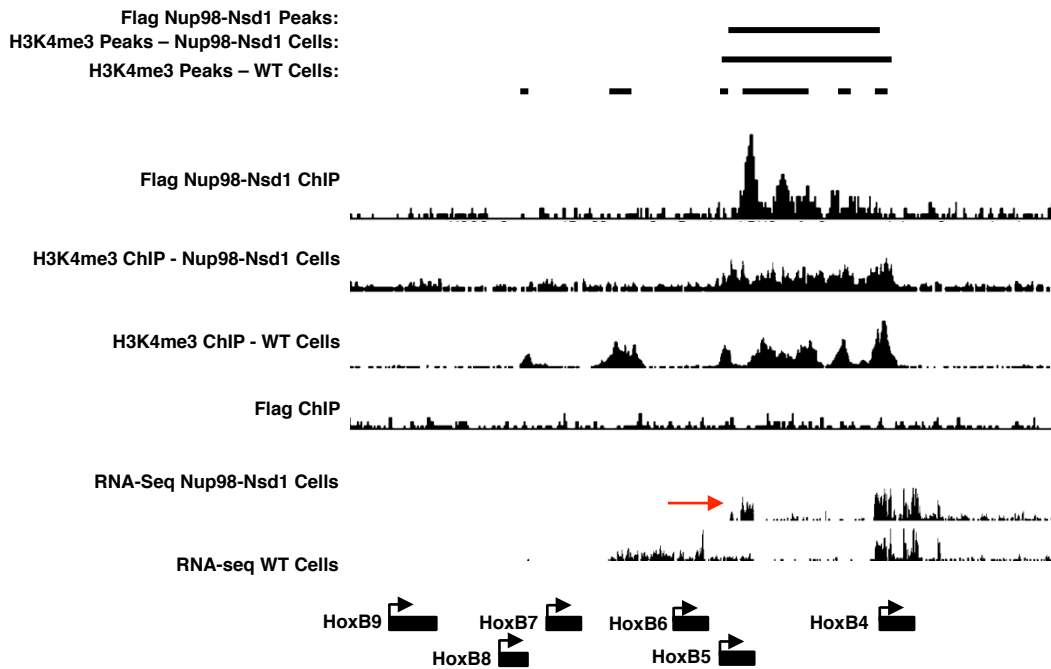

B

## Nup98-Nsd1 RNA-Seq (Genes Down)

| Functional Annotation                                 | Genes | P-value  |
|-------------------------------------------------------|-------|----------|
| Suppressor of Cytokine Signaling                      | 4     | 1.4 E-05 |
| Extracellular Protein                                 | 29    | 5.9 E-05 |
| Membrane Protein                                      | 118   | 1.3 E-04 |
| Intracellular Signaling Cascade                       | 31    | 1.6 E-04 |
| GTP Binding                                           | 16    | 3.0 E-04 |
| Guanyl Nucleotide Binding                             | 14    | 4.0 E-04 |
| Glycoprotein                                          | 81    | 7.0 E-04 |
| Disulfide Bond Containing                             | 60    | 7.8 E-04 |
| Lipoprotein                                           | 21    | 1.2 E-03 |
| Transmembrane Receptor (Serine/Threonine Kinase Sig.) | 7     | 1.6 E-03 |

## Nup98-Nsd1 RNA-Seq (Genes Up)

| Functional Annotation               | Genes | P-value  |
|-------------------------------------|-------|----------|
| Topological Domain: Extracellular   | 60    | 1.2 E-07 |
| Topological Domain: Cytoplasmic     | 67    | 2.4 E-06 |
| Membrane Protein                    | 101   | 1.7 E-05 |
| Immunoglobulin Subtype              | 13    | 9.1 E-04 |
| Regulation of Cell Migration        | 7     | 1.1 E-03 |
| Rho-Gap Domain                      | 6     | 1.1 E-03 |
| GTPase Regulator                    | 14    | 1.2 E-03 |
| Cytokine Binding                    | 7     | 1.2 E-03 |
| Nucleoside Triphosphatase Regulator | 14    | 1.3 E-03 |
| DNA Binding Protein                 | 11    | 1.8 E-03 |

A

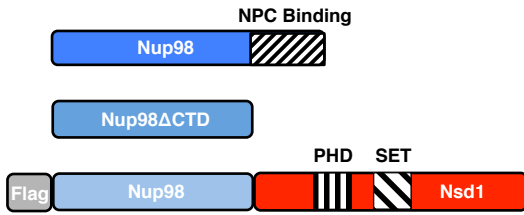

B

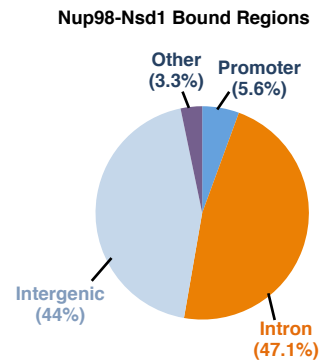

C

| Functional Annotation              | Genes | P-value  |
|------------------------------------|-------|----------|
| Regulation of Pol II Transcription | 56    | 8 E-07   |
| Regulation of Cell Proliferation   | 16    | 1.4 E-05 |
| Angiogenesis                       | 14    | 3.8 E-04 |
| T-cell Differentiation             | 6     | 7.5 E-04 |
| Ubl Conjugation                    | 43    | 8.4 E-04 |

E

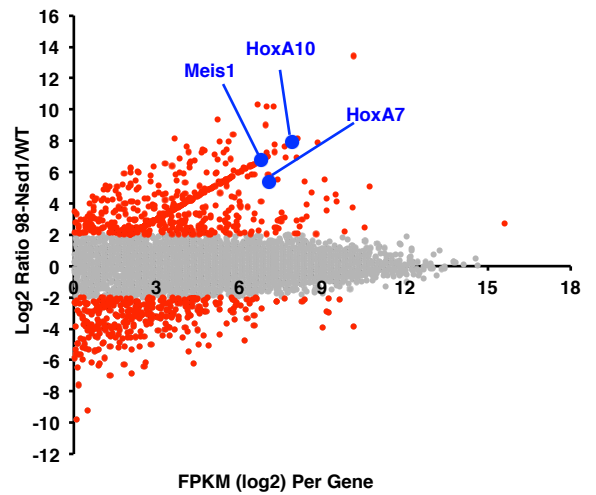

D

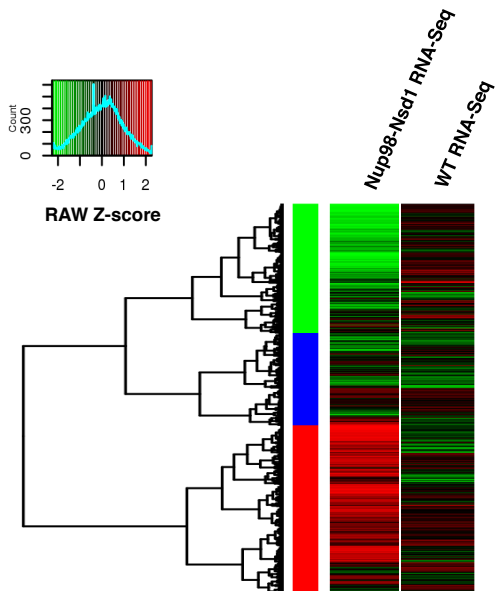

F

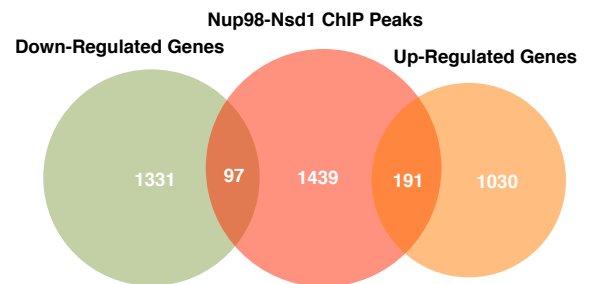

Supplement: supp_gad.306753.117_Supplemental_Material.pdf [file supp_gad.306753.117_Supplemental_Material.pdf]
